# Supplementary material for: The Effect of Absent or Deferred Antibiotic Treatment on Pharyngotonsillitis Complications in Primary Care Before, During, and After the COVID-19 pandemic
Source: Research Square preprint supplement (doi:10.21203/rs.3.rs-5903243/v1), 2025-04-17
Supplement: Supplementary file 1 [file 206b81a68ab0b842eb58e0e6.docx]

**Supplementary material for**

**The Effect of Absent or Deferred Antibiotic Treatment on Pharyngotonsillitis Complications in Primary Care Before, During, and After the COVID-19 pandemic**

Ailiana Santosa, Julius Collin, Elin Dahlén, Anders Lignell, Maria Furberg, Anders Ternhag, Rickard Ljung, Fredrik Nyberg

**Suppl Table 1**. Codes used for identification of pharyngotonsillitis and infectious complications observed within 30 days of the pharyngotonsillitis diagnosis.

| **Diagnosis**∞ | **ICD-10 codes** |  | **Complication§** | **ICD-10 codes** |
| --- | --- | --- | --- | --- |
| Pharyngotonsillitis | J02, J02.0, J02.8, J02.9, J03, J03.0, J03.8, J03.9, J01AA02, J01CE02, J01CA04, J01CR02, J01DB, J01DC, J01DD, J01DE, J01FA, J01FF01 | → | Peritonsillar abscess | J36, J36.9 |
|  | → | Retro-parapharyngeal abscess | J390 |
|  | → | Necrotizing fasciitis | M726 |
|  | → | Streptococcal sepsis | A400  A403  A409 |
|  | → | Rheumatic fever | I00, I00.9  I01, I01.9 |

Footnote: ∞ pharyngotonsillitis diagnosis retrieved from primary healthcare registers in Stockholm and Västra Götaland regions between 1 January 2018 and 31 December 2023.

**§** complications occurred within 30 days after pharyngotonsillitis diagnosis

**Suppl Table 2.** ATC codes used to classify antibiotics commonly prescribed for the treatment of pharyngotonsillitis

| **Respiratory tract antibiotics** | **ATC codes** | **Proportion (%)** |
| --- | --- | --- |
| Penicillin V |  |  |
| Phenoximethylpenicillin (PcV) | J01CE02 | 89.5% |
| Other |  |  |
| Doxycycline | J01AA02 | 0.96% |
| Amoxicillin | J01CA04 | 1.06% |
| Amoxicillin/Clavulanic acid | J01CR02 | 0.26% |
| Cephalosporines | J01DB-DE | 0.82% |
| Macrolides | J01FA01, J01FA09, J01FA10 | 1.55% |
| Clindamycin | J01FF01 | 5.85% |

**Suppl Table 3.** ICD-codes used for Charlson Comorbidity Index.

| **Comorbidity** | **ICD-10 codes** |
| --- | --- |
| Myocardial infarction | I21, 122, 125.2 |
| Congestive heart failure | I11.0, I13.0, I13.2, I25.5, I42.0, I42.6, I42.7, I42.8, I42.9, I43, I50, |
| Peripheral vascular disease | I70, I71, I73.1, I73.8, I73.9, I77.1, I79.0, I79.2, K55 |
| Cerebrovascular disease | G45, I60, I61, I62, I63, I64, I67, I69, |
| COPD | J43, J44, |
| Other chronic pulmonary disease | J41, J42, J45, J46, J47, J60, J61, J62, J63, J64, J65, J66, J67, J68, J69, J70 |
| Rheumatic disease | M05; M06, M12.3, M07.0–3, M08, M13, M30, M31.3-M31.6, M32, M33, M34, M35.0, M35.1, M35.3, M45-46 |
| Dementia | F00, F01, F02, F03, F05.1, G30, G31.1, G31.9 |
| Hemiplegia, tetraplegia | G11.4, G80, G81, G82, G83.0-G83.3, G83.8 |
| Diabetes | E10.0, E10.1, E11.0-E11.1, E12.0-E12.1, E13.0-E13.1,  E14.0-E14.1 |
| Diabetes with end organ damage | E10.2, E10.3, E10.4, E10.5, E10.7, E11.2-E11.7, E12.2-E12.7, E13.2-E13.7, E14.2-E14.7, |
| Moderate or severe kidney disease | N03.2-N03.7, N05.2-N05.7, N11, N18, N19, N25.0, I12.0, I13.1, Q61.1-Q61.4, Z49, Z94.0, Z99.2 |
| Mild liver disease | B15-B19, K70.3, K73, K74.6, K70.3, K75.4 |
| Moderate or severe liver disease | R18, I85.0, I85.9, I98.2, I98.3 |
| Peptic ulcer disease | K25, K26, K27, K28 |
| Any malignancy including leukemia and lymphoma | C00-C97 not C87, C00, C01, C02, C03, C04, C05, C06, C07, C08, C09, C10, C11, C12, C13, C14, C15, C16, C17, C18, C19, C20, C21, C22, C23, C24, C25, C26, C30, C31, C32, C33, C34, C37, C38, C39, C40, C41, C43, C45, C46, C47, C48, C49, C50, C51, C52, C53, C54, C55, C56, C57, C58, C60, C61, C62, C63, C64, C65, C66, C67, C68, C69, C70, C71, C72, C73, C74, C75, C76, C81, C82, C83, C84, C85, C86, C88, C90, C91, C92, C93, C94, C95, C96, C97 |
| Metastatic cancer | C77, C78, C79, C80 |
| Hiv/Aids | B20, B21, B22, B23, B24, F02.4, O98.7, R75, Z11.4, Z21.9, Z71.1 |

**Suppl Table 4.** Definitions for immunosuppression (i.e. autoimmune disease or immunosuppressive treatment)

| Autoimmun disease / immunosuppression: | ICD-10 or ATC codes |
| --- | --- |
| Autoimmune disease (ICD-10 codes) | D510, D590, D591, D690, D693, D86, E035, E039, E050, E055, E059, E063, E065, E271, E272, E310 G04, G131, G35, G36, G61, G700 H20 I00-I02 K50, K51, K732, K743, K900 L10, L12, L130, L40, L63, L80 M05-06, M08, M30, M311, M313, M315-7, M32-34, M350-M353, M358-M359, M45, M60  C00-96 (NOT C44), D70-72, D730, D81-84  E10-14 |
| Immunosuppressive treatment (ATC codes) | L04AA selective immunosuppressants  L04AB TNF-alfa inhibitors  L04AC Interleukin inhibitors  L04AD Calcineurin inhibitors  L04AX Other immunosuppressants  L01BA01 Methotrexate  L01AA01 Cyclophosphamide  H02AB Glucocorticoids |

**Suppl Table 5**. Characteristics of sociodemographics, prior comorbidities, healthcare utilization, COVID-19 vaccination and drug prescriptions among pharyngotonsillitis between 1 January 2018 and 31 December 2023 and received antibiotic treatment, *by pandemic period*

| Characteristics | **Pre-pandemic** | **Pandemic** | **Post-pandemic** |
| --- | --- | --- | --- |
| n=58,109 | n=40,369 | n=43,473 |
| Sex, male | 22,477 (38.7%) | 15,107 (37.4%) | 16,279 (37.4%) |
| Age group (years) | | | |
| 12-24 | 19,594 (33.7%) | 11,771 (29.2%) | 10,607 (24.4%) |
| 25-39 | 19,506 (33.6%) | 14,275 (35.4%) | 17,411 (40.1%) |
| 40-69 | 16,581 (28.5%) | 12,473 (30.9%) | 13,484 (31.0%) |
| 70+ | 2,428 (4.2%) | 1,850 (4.6%) | 1,971 (4.5%) |
| Education level | | | |
| Primary school | 14,905 (25.7%) | 10,820 (26.8%) | 11,268 (25.9%) |
| Secondary school | 6,500 (11.2%) | 4,664 (11.6%) | 4,610 (10.6%) |
| Tertiary school<3 years | 15,537 (26.7%) | 10,149 (25.1%) | 11,332 (26.1%) |
| Tertiary school≥ 3years | 21,167 (36.4%) | 14,736 (36.5%) | 16,263 (37.4%) |
| Marital status | | | |
| Not married | 41,119 (70.8%) | 29,539 (73.2%) | 31,183 (71.7%) |
| Married/register partner | 16,990 (29.2%) | 10,830 (26.8%) | 12,290 (28.3%) |
| Country of birth | | | |
| Nordic countries | 46,681 (80.3%) | 32,045 (79.4%) | 34,672 (79.8%) |
| Other countries | 11,428 (19.7%) | 8,324 (20.6%) | 8,801 (20.2%) |
| Vaccination | | | |
| None | 8,143 (14.0%) | 5,324 (13.2%) | 6,664 (15.3%) |
| 1 vaccine | 1,549 (2.7%) | 1,159 (2.9%) | 1,204 (2.8%) |
| 2 vaccine | 17,273 (29.7%) | 12,424 (30.8%) | 12,871 (29.6%) |
| Booster | 31,144 (53.6%) | 21,462 (53.2%) | 22,734 (52.3%) |
| Number of primary care visits | | | |
| One visit | 44,981 (77.4%) | 29,412 (72.9%) | 32,790 (75.4%) |
| Two visits | 10,297 (17.7%) | 8,290 (20.5%) | 8,231 (18.9%) |
| Three visits | 2,274 (3.9%) | 2,094 (5.2%) | 1,950 (4.5%) |
| Four or more visits | 557 (1.0%) | 573 (1.4%) | 502 (1.2%) |
| Charlson comorbidity index | | | |
| 0 | 46,335 (79.7%) | 31,314 (77.6%) | 34,658 (79.7%) |
| 1 | 5,252 (9.0%) | 3,790 (9.4%) | 4,019 (9.2%) |
| 2-3 | 1,924 (3.3%) | 1,448 (3.6%) | 1,603 (3.7%) |
| 4-5 | 171 (0.3%) | 187 (0.5%) | 194 (0.4%) |
| ≥6 | 4,427 (7.6%) | 3,630 (9.0%) | 2,999 (6.9%) |
| Autoimmune/immunosuppression | 4,168 (7.2%) | 3,572 (8.8%) | 4,450 (10.2%) |
| Immunosuppressive treatments | | | |
| Selective immunosuppressants | 45 (0.1%) | 71 (0.2%) | 93 (0.2%) |
| TNF-alfa inhibitors | 338 (0.6%) | 292 (0.7%) | 479 (1.1%) |
| Interleukin inhibitors | 90 (0.2%) | 78 (0.2%) | 129 (0.3%) |
| Other immunosuppressants | 497 (0.9%) | 488 (1.2%) | 672 (1.5%) |
| Glucocorticoids | 3,410 (5.9%) | 4,326 (10.7%) | 5,998 (13.8%) |
| Cytostatic | 96 (0.2%) | 97 (0.2%) | 212 (0.5%) |

Footnote: Pre-pandemic: 1 Jan 2018-31 Jan 2020; Pandemic: 1 Feb 2020-28 Feb 2022; Post pandemic: 1 Mar 2022-31 Jan 2024

**Suppl Table 6**. Proportion of complications observed within 30 days among pharyngotonsillitis patients aged 12 years and above between1 January 2018 and 31 January 2024, stratified *by pandemic period.*

| **Period** | **Antibiotic treatment** | **Complications** | **Type of complications** | | | | |
| --- | --- | --- | --- | --- | --- | --- | --- |
| Peritonsillar abscess | Retropharyngeal and  parapharyngeal abscess | Rheumatic fever | Necroti-zing fasciitis | Bacteraemia |
| Pre-pandemic | Yes | 1124 (1.38%) | 1100 (1.35%) | 29 (0.04%) | 0 | <5(0) | 10 (0.01%) |
| No | 222 (0.38%) | 208 (0.38%) | 17 (0.03%) | 0 | <5(0) | <5(0) |
| Pandemic | Yes | 692 (2.58%) | 683 (2.55%) | 12 (0.04%) | 0 | 0 | <5(0) |
| No | 169 (0.42%) | 154 (0.38%) | 14 (0.03%) | 0 | 0 | <5(0) |
| Post- pandemic | Yes | 879 (1.92%) | 864 (1.89%) | 21 (0.05%) | 0 | <5(0) | <5(0) |
| No | 221 (0.51%) | 215 (0.49%) | 7 (0.02%) | 0 | <5(0) | <5(0) |

Footnote: Pre-pandemic: 1 Jan 2018-31 Jan 2020; Pandemic: 1 Feb 2020-28 Feb 2022; Post pandemic: 1 Mar 2022-31 Jan 2024
